# Supplementary material for: The case against hole injection through SAMs in perovskite solar cells
Source: Royal Society of Chemistry journal article supplement (doi:10.1039/d5ta06749a), 2025-01-01
Supplement: d5ta06749a1.pdf [file d5ta06749a1.pdf]

# Supplementary Information for: The Case Against Hole Injection Through SAMs in Perovskite Solar Cells

*Fraser J. Angus<sup>1†</sup>, Lewis Mackenzie<sup>1†</sup>, Marcin Giza<sup>1</sup>, Dylan Wilkinson<sup>1</sup>, Elisabetta Arca<sup>2</sup>, Emilio Palomares<sup>3,4</sup>, Wenhui Li<sup>3\*</sup>, Pablo Docampo<sup>1,5\*</sup>, Graeme Cooke<sup>1\*</sup>*

<sup>1</sup>School of Chemistry, University of Glasgow, Glasgow G12 8QQ, UK

<sup>2</sup>School of Mathematics, Statistics and Physics, Newcastle University, Newcastle upon Tyne, NE1 7RU, UK

<sup>3</sup>Institute of Chemical Research of Catalonia (ICIQ- CERCA), 43007 Tarragona, Spain

<sup>4</sup>Catalan Institution for Research and Advanced Studies (ICREA), 08010 Barcelona, Spain

<sup>5</sup>Basque Center for Materials, Applications and Nanostructures (BCMaterials), 48940 Leioa, Spain

<sup>†</sup>Authors contributed equally

\*Graeme.Cooke@glasgow.ac.uk; Pablo.Docampo@bcmaterials.net; wli@iciq.es

## 14 Contents

|    |                                                                  |    |
|----|------------------------------------------------------------------|----|
| 15 | Supplementary Note 1 – Spiro-B Synthesis & Characterisation..... | 2  |
| 16 | Supplementary Note 2 – TRPL Analysis .....                       | 16 |
| 17 | Supplementary Figures .....                                      | 17 |
| 18 | Supplementary Tables.....                                        | 23 |
| 19 |                                                                  |    |

## 20 Supplementary Note 1 – Spiro-B Synthesis & Characterisation

21 A Bruker Avance III 400 spectrometer was used to obtain NMR spectra ( $^1\text{H}$  NMR at 400 MHz  
22 and  $^{13}\text{C}$  NMR at 100 MHz) with chemical shift values given in ppm with reference to  
23 tetramethylsilane, and these were analysed using MestReNova®. The spin coupling patterns  
24 observed in NMR spectra are described as singlet (s), doublet (d), triplet (t), quartet (q), quintet  
25 (quint), multiplet (m) or a combination of these. Mass spectrometry was performed by the mass  
26 spectrometry service at the University of Glasgow (ESI). Melting points were recorded on an SMP-  
27 10 Stuart Scientific melting point machine and are uncorrected.

28 Merck silica gel 60 covered aluminium plates F254 were used for thin-layer chromatography  
29 (TLC) analysis. Column chromatography purification was carried out using silica gel  
30 (Fluorochem®) 40–63 nm 60 Å. Reagents were purchased from Sigma Aldrich®, Alfa Aesar®,  
31 Fluorochem®, or BLD Pharm® and were used without further purification. Anhydrous solvents  
32 were obtained using an Innovative Technology Inc. Pure Solv 400-5-MD solvent purification  
33 system or purchased from Sigma Aldrich®.

34 Computational structural optimisations were performed using Gaussian 09, Revision D.01, 2013  
35 and structures/molecular orbitals graphics were generated using GaussView 5.0.9. All structures  
36 were first optimised using the semi-empirical method AM1 and then optimised using B3LYP/3-

21G. Frequency calculations were performed on each structure to confirm a local minimum had been reached by the absence of imaginary frequencies.

The thermogravimetric analysis (TGA) was performed on a TA Instruments TGA 5500 using a platinum pan, with the temperature ranging from 30 °C to 600 °C at a rate of 10 °C/min. The differential scanning calorimetry (DSC) was run under N<sub>2</sub> on a TA Instruments DSC 25 using an aluminium pan. The sample was heated at a rate of 10 °C/min.

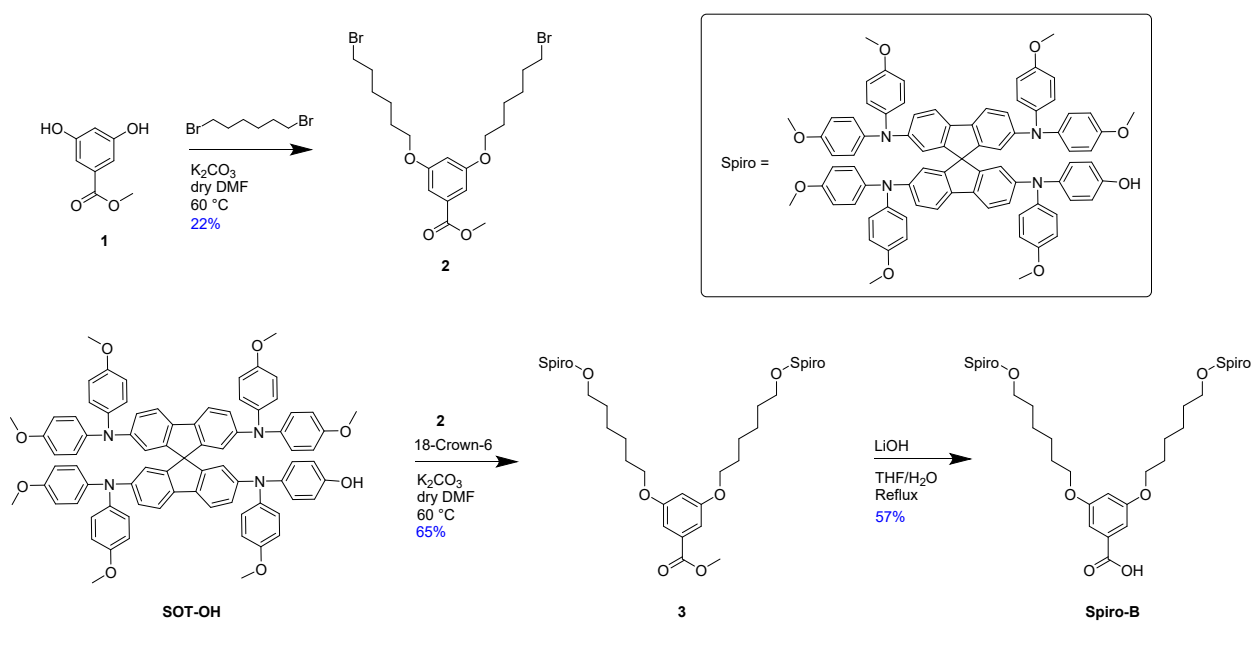

## Scheme S1 Synthesis of Spiro-B.

### Compound 2<sup>1</sup>

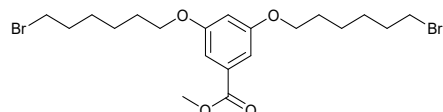

Compound 1 (1.00 g, 5.95 mmol) and potassium carbonate (2.47 g, 17.8 mmol) were dissolved in anhydrous dimethylformamide (25 mL), and the reaction was stirred at 60 °C under a nitrogen

50 atmosphere for 15 minutes. 1,6-Dibromohexane (7.25 g, 29.7 mmol) was then added. The reaction  
51 was stirred for 19 h before being poured into water (100 mL) and extracted with ethyl acetate (3 x  
52 50 mL). The organic extracts were combined, washed with brine (100 mL), dried with magnesium  
53 sulphate, filtered, and the solvent removed under reduced pressure. The resulting residue was  
54 purified using silica gel chromatography (10% ethyl acetate in pet. ether) to give a clear oil (1.29  
55 g). The product was further purified by dissolving it in a minimum volume of dichloromethane  
56 and then pouring it into petroleum ether (*ca.* 100 mL). After being left in a freezer (-18 °C)  
57 overnight, a precipitate formed, which was filtered and washed with petroleum ether to afford the  
58 title compound as a white crystalline powder (0.639 g, 21.7%). Mpt. 25–26 °C. <sup>1</sup>H NMR (400  
59 MHz, CDCl<sub>3</sub>) δ 7.16 (d, *J* = 2.3 Hz, 2H), 6.63 (t, *J* = 2.4 Hz, 1H), 3.98 (t, *J* = 6.4 Hz, 4H), 3.90 (s,  
60 3H), 3.43 (t, *J* = 6.8 Hz, 4H), 1.89 (p, *J* = 6.9 Hz, 4H), 1.80 (p, *J* = 6.7 Hz, 4H), 1.58 – 1.43 (m,  
61 8H). <sup>13</sup>C NMR (101 MHz, CDCl<sub>3</sub>) δ 167.1, 160.2, 132.1, 107.8, 106.7, 68.2, 52.4, 33.9, 32.8, 29.1,  
62 28.0, 25.4. HRMS *m/z* (ESI): [M+H<sup>+</sup>] = 495.0568 (C<sub>20</sub>H<sub>31</sub>Br<sub>2</sub>O<sub>4</sub> requires 495.0569). *v*<sub>max</sub>/cm<sup>-1</sup>  
63 (neat) 2938 (*ar* C-H), 2859 (*alk* C-H), 1718 (C=O), 1592 (*ar* C=C), 1447 (*ar* C=C), 1435 (*ar* C=C),  
64 1233 (*ar* C-O), 1161 (*ester* C=O), 1052 (*alk* C-O), 1013 (*alk* C-O).

### 65 Compound 3

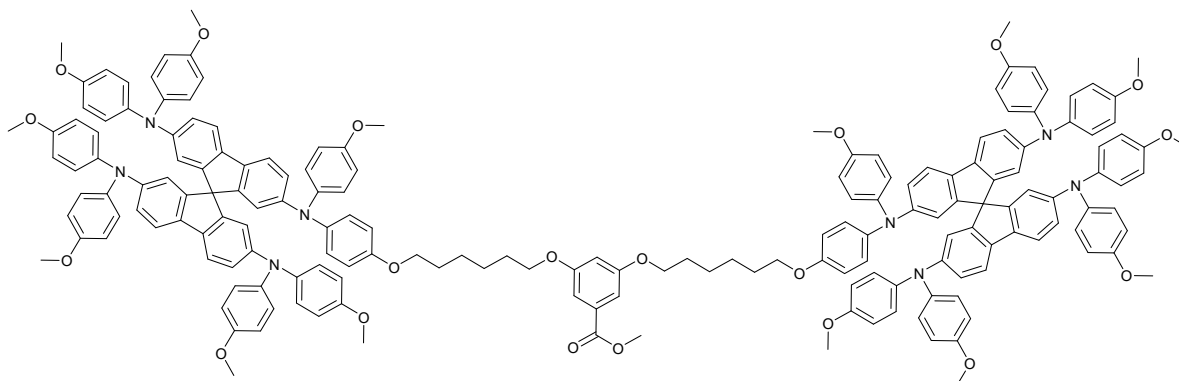

67 Compound **2** (0.060 g, 0.121 mmol), **SOT-OH** (0.309 g, 0.255 mmol), potassium carbonate  
 68 (0.0671 g, 0.486 mmol), and a spatula tip of 18-crown-6 (*c.a.* 5 mg) were dissolved in anhydrous  
 69 dimethylformamide (15 mL). The reaction was heated to 60 °C and stirred for 23 h. under a  
 70 nitrogen atmosphere before being poured into water (150 mL), and the product was extracted with  
 71 ethyl acetate (3 × 50 mL). The organic extracts were combined, washed with brine (50 mL), dried  
 72 with magnesium sulphate, filtered, and solvent removed under reduced pressure. The resulting  
 73 residue was purified using silica gel chromatography (4:4:1 petroleum ether: ethyl acetate: toluene)  
 74 to give the title compound as an off-white solid (0.216 g, 64.7%). Mpt. 152 – 155 °C. <sup>1</sup>H NMR  
 75 (400 MHz, C<sub>6</sub>D<sub>6</sub>) δ 7.59 (d, *J* = 2.3 Hz, 2H), 7.15 – 7.13 (m, 8H), 7.10 – 6.97 (m, 48H), 6.85 (t, *J*  
 76 = 2.3 Hz, 1H), 6.84 – 6.81 (m, 4H), 6.77 – 6.72 (m, 28H), 3.63 (t, *J* = 6.4 Hz, 4H), 3.59 (t, *J* = 6.4  
 77 Hz, 4H), 3.29 – 3.25 (m, 42H), 1.60 – 1.49 (m, 8H), 1.31 – 1.20 (m, 8H). <sup>13</sup>C NMR (101 MHz,  
 78 C<sub>6</sub>D<sub>6</sub>) δ 166.8, 161.0, 156.0, 156.0, 155.5, 150.9, 148.2, 142.0, 142.0, 135.9, 132.9, 125.9, 125.8,  
 79 123.0, 120.7, 118.4, 115.5, 115.0, 108.2, 107.2, 68.2, 68.0, 66.5, 55.0, 51.8, 29.6, 29.4, 26.1, 26.1.  
 80 HRMS *m/z* (ESI): [M]<sup>2+</sup> = 1377.5898 (C<sub>180</sub>H<sub>159</sub>N<sub>8</sub>O<sub>20</sub> requires 1377.5902). *v*<sub>max</sub>/cm<sup>-1</sup> (neat) 3037  
 81 (*alk* C-H), 2903 (*alk* C-H), 2834 (*alk* C-H), 1722 (C=O), 1604 (*ar* C=C), 1504 (*ar* C=C), 1463 (*ar*  
 82 C=C), 1237 (*ester/ar* C-O), 1034 (*alk* C-O).

### 83 Spiro-B

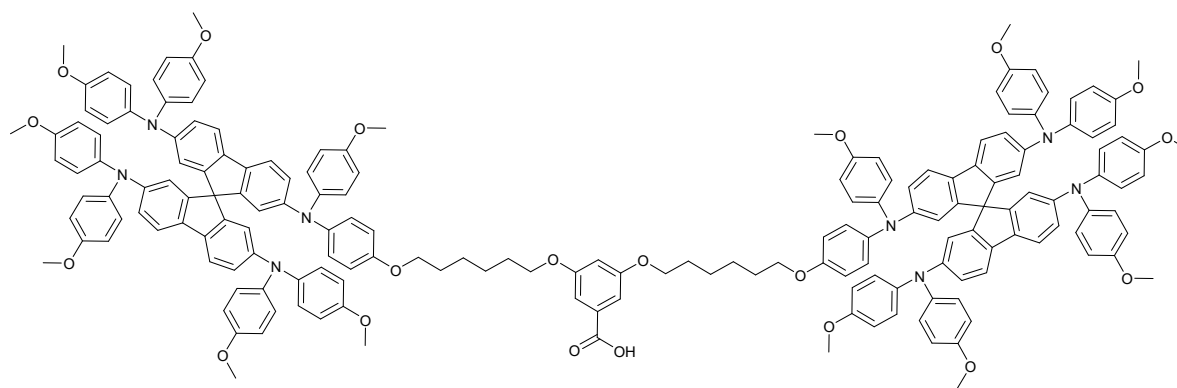

85 Compound **2** (0.100 g, 0.0363 mmol) was dissolved in tetrahydrofuran (10 mL), and then lithium  
86 hydroxide (6.55 mg, 0.273 mmol) dissolved in deionised water (0.5 mL) was added dropwise. The  
87 reaction was heated under reflux and stirred for 19.5 h under a nitrogen atmosphere before being  
88 cooled to room temperature. Aqueous hydrochloric acid (5% V/V) was then added dropwise until  
89 pH > 1 was achieved. The mixture was diluted with water (10 mL) and extracted with ethyl acetate  
90 (3 × 30 mL). The organic extracts were combined, washed with brine (2 x 60 mL), dried with  
91 magnesium sulphate, filtered, and solvent removed under reduced pressure. The resulting residue  
92 was dissolved in a minimum volume of ethyl acetate and poured dropwise into petroleum ether  
93 (*ca.* 60 mL). The precipitate was collected by filtration to afford the title compound as a white  
94 solid (0.057 g, 57.3%). Mpt. 168 – 171 °C. <sup>1</sup>H NMR (400 MHz, C<sub>6</sub>D<sub>6</sub>) δ 7.59 (d, *J* = 2.4 Hz, 2H),  
95 7.17 – 7.12 (m, 6H), 7.12 – 6.94 (m, 48H), 6.86 (t, *J* = 2.3 Hz, 1H), 6.83 (d, *J* = 9.0 Hz, 4H), 6.74  
96 (d, *J* = 9.0 Hz, 26H), 3.60 (t, *J* = 6.4 Hz, 8H), 3.34 – 3.23 (m, 42H), 1.60 – 1.49 (m, 8H), 1.29 –  
97 1.21 (m, 8H). <sup>13</sup>C NMR (101 MHz, C<sub>6</sub>D<sub>6</sub>) δ 160.6, 155.6, 155.6, 155.1, 150.5, 147.8, 141.7, 141.6,  
98 135.6, 135.5, 135.5, 125.6, 125.5, 122.6, 120.3, 117.9, 117.9, 115.2, 114.6, 108.2, 107.7, 67.8,  
99 67.6, 66.2, 54.6, 29.3, 29.0, 25.8, 25.7. HRMS *m/z* (ESI): [M+H<sup>+</sup>] = 2742.1703 (C<sub>179</sub>H<sub>159</sub>N<sub>8</sub>O<sub>20</sub>  
100 requires 2742.1731). *v*<sub>max</sub>/cm<sup>-1</sup> (neat) 3034 (*ar* C-H), 2904 (*alk* C-H), 2832 (*alk* C-H), 1726 (C=O),  
101 1695 (C=O), 1605 (*ar* C=C), 1502 (*ar* C=C), 1461 (*ar* C=C), 1236 (*ester/ar* C-O), 1032 (*alk* C-  
102 O).

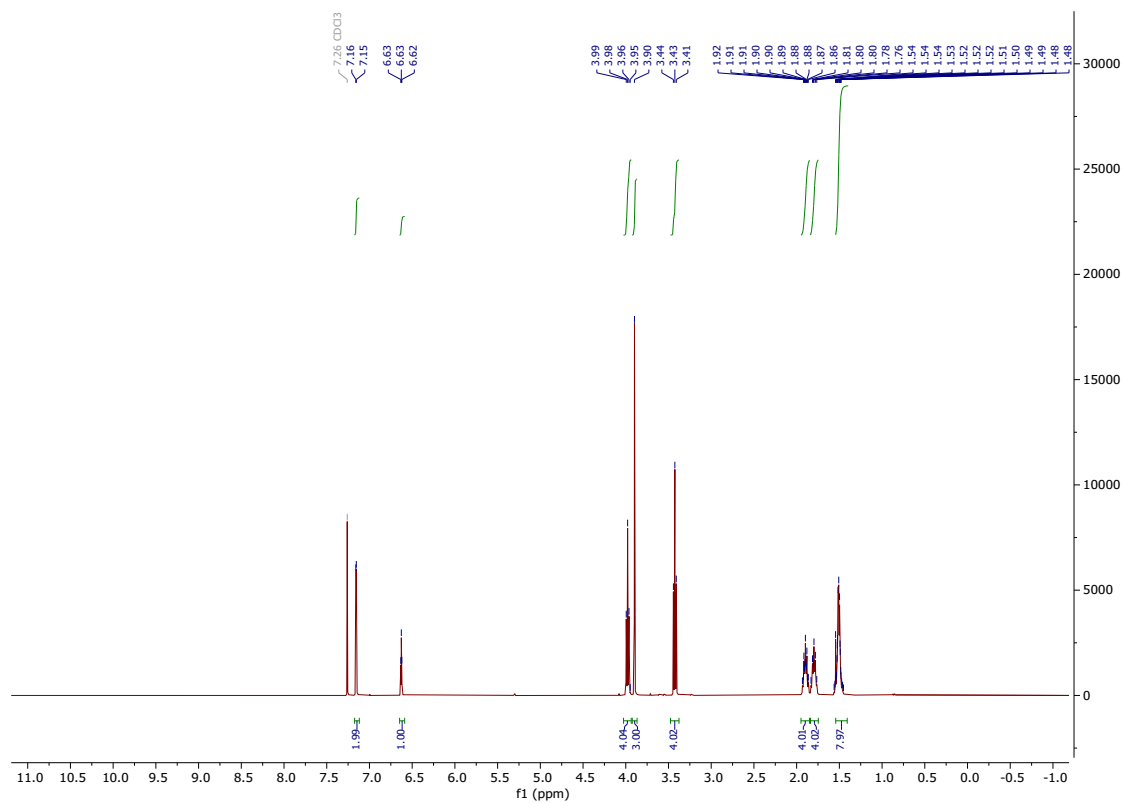

103

104 **Figure S1.** <sup>1</sup>H NMR of compound **2** in CDCl<sub>3</sub>

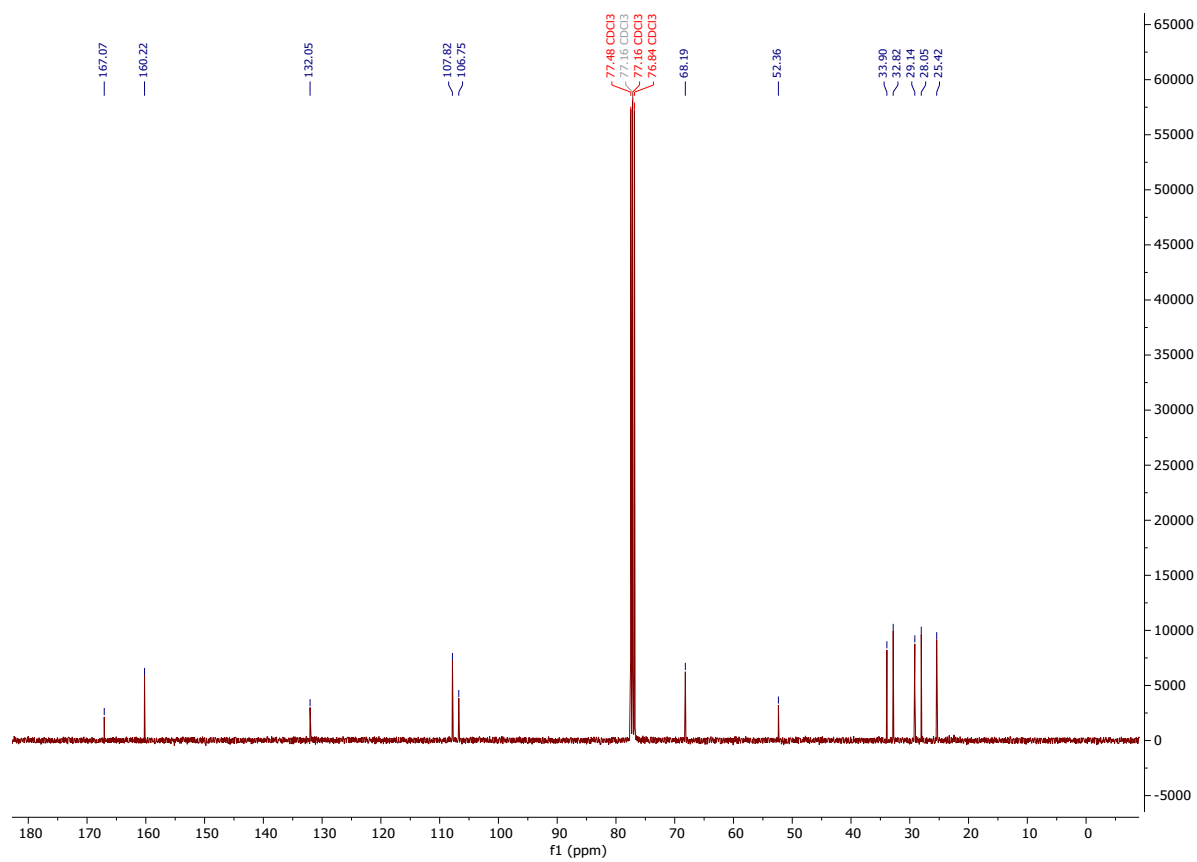

105

106 **Figure S2.** <sup>13</sup>C NMR of compound **2** in CDCl<sub>3</sub>



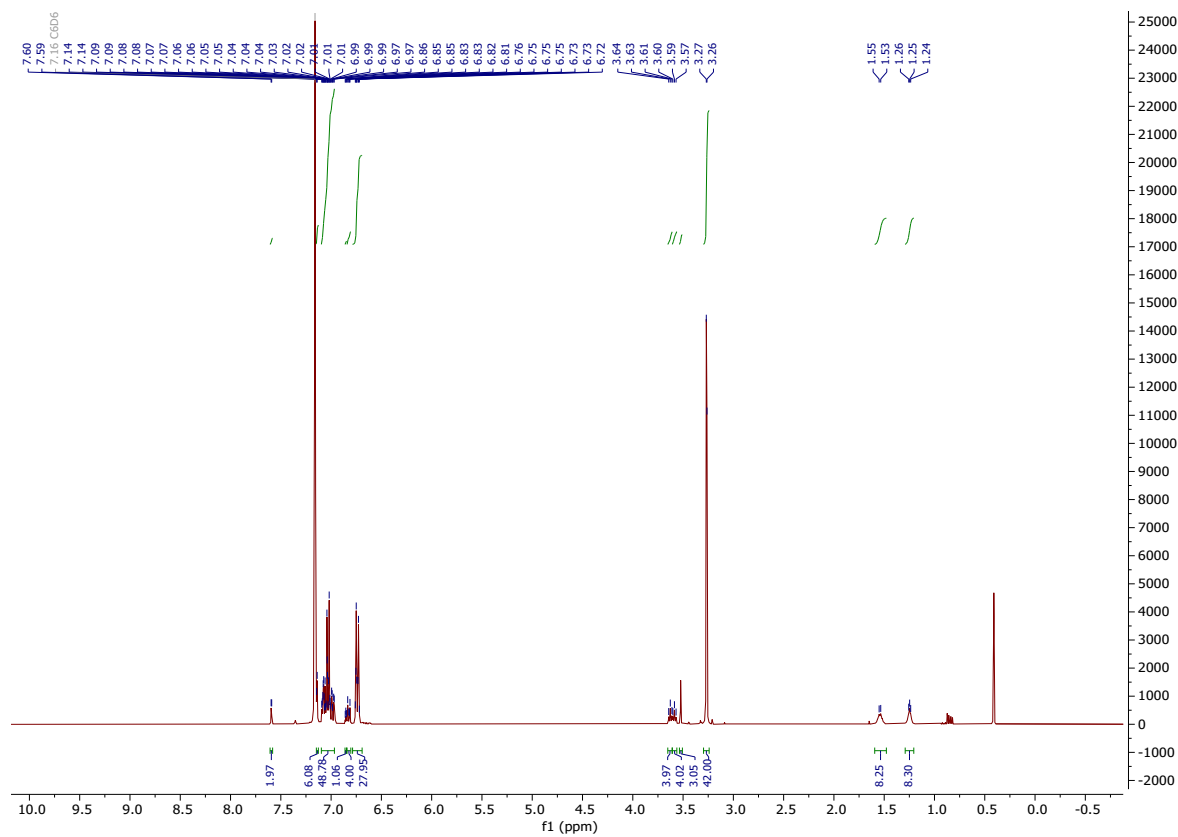

107

108 **Figure S3.** <sup>1</sup>H NMR of compound **3** C<sub>6</sub>D<sub>6</sub>

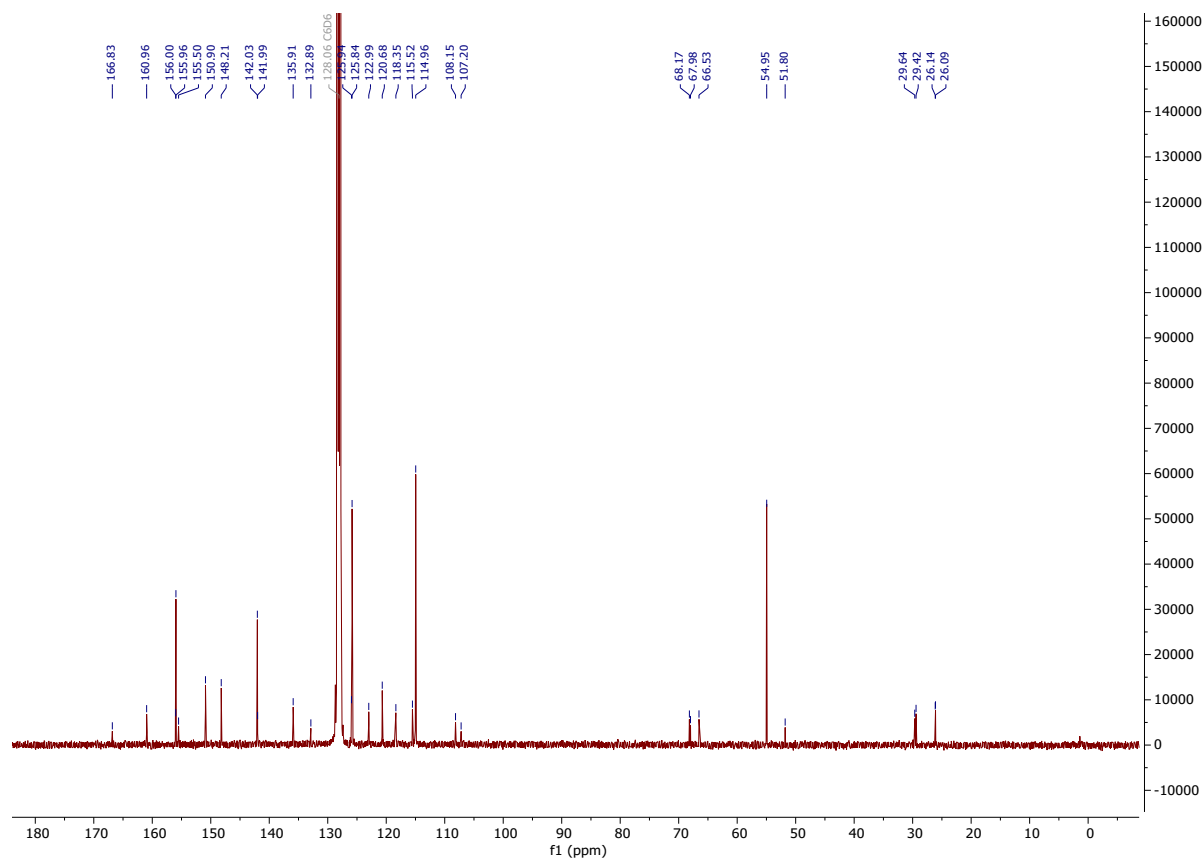

109

110 **Figure S4.** <sup>13</sup>C NMR of Compound 3 in C<sub>6</sub>D<sub>6</sub>

111

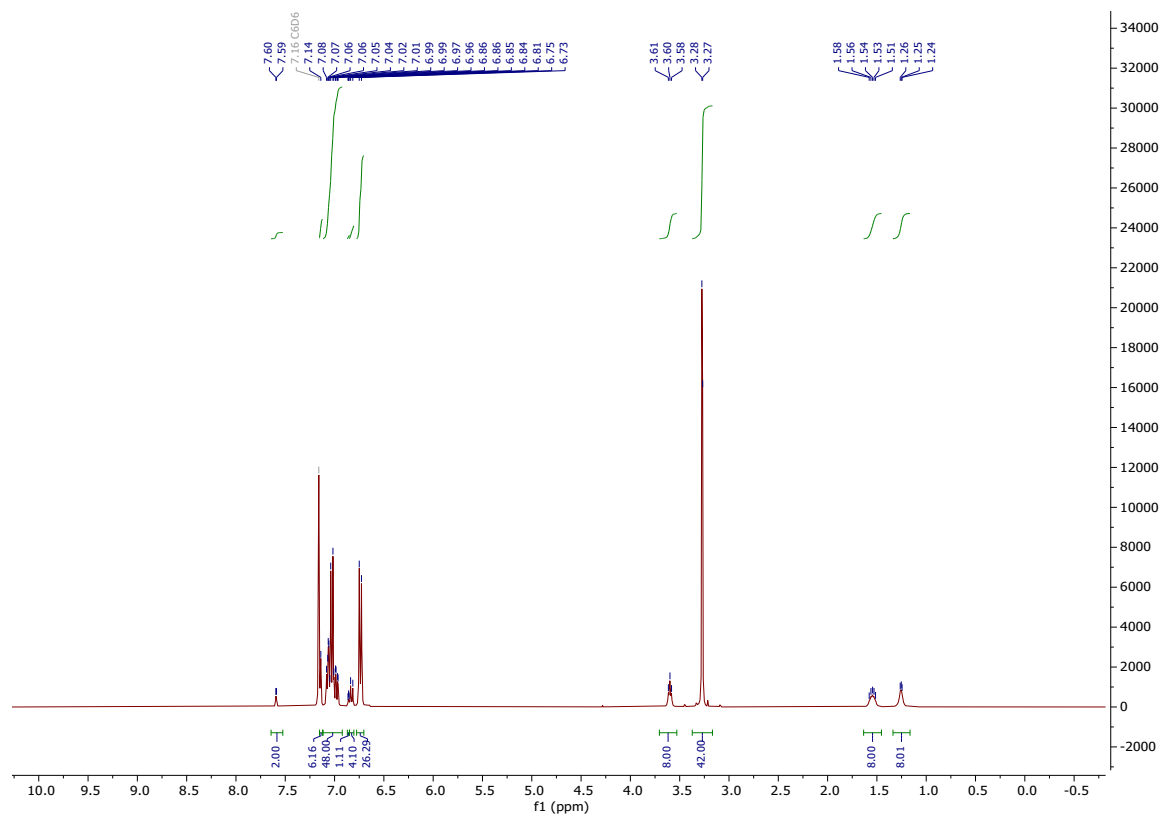112 **Figure S5.** <sup>1</sup>H NMR of Spiro-B in C<sub>6</sub>D<sub>6</sub>

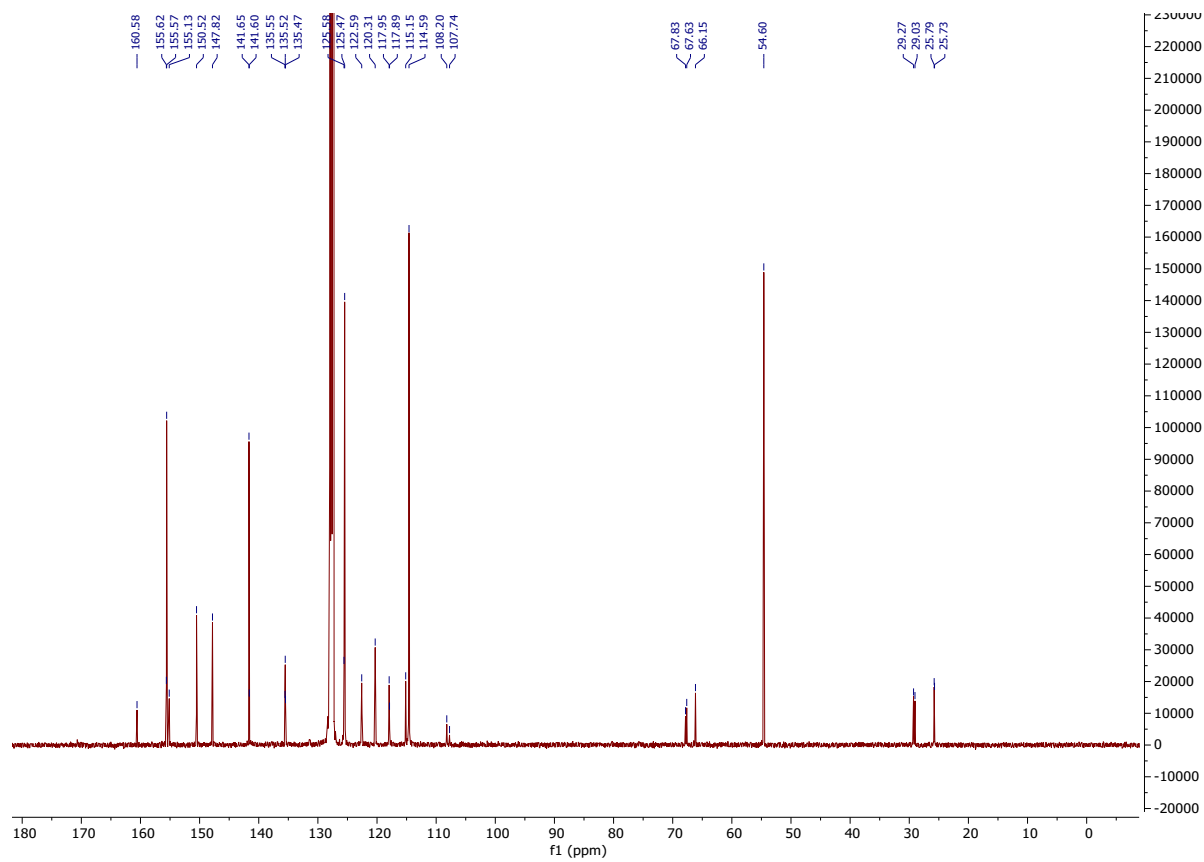

113

114 **Figure S6.**  $^{13}\text{C}$  NMR of **Spiro-B** in  $\text{C}_6\text{D}_6$

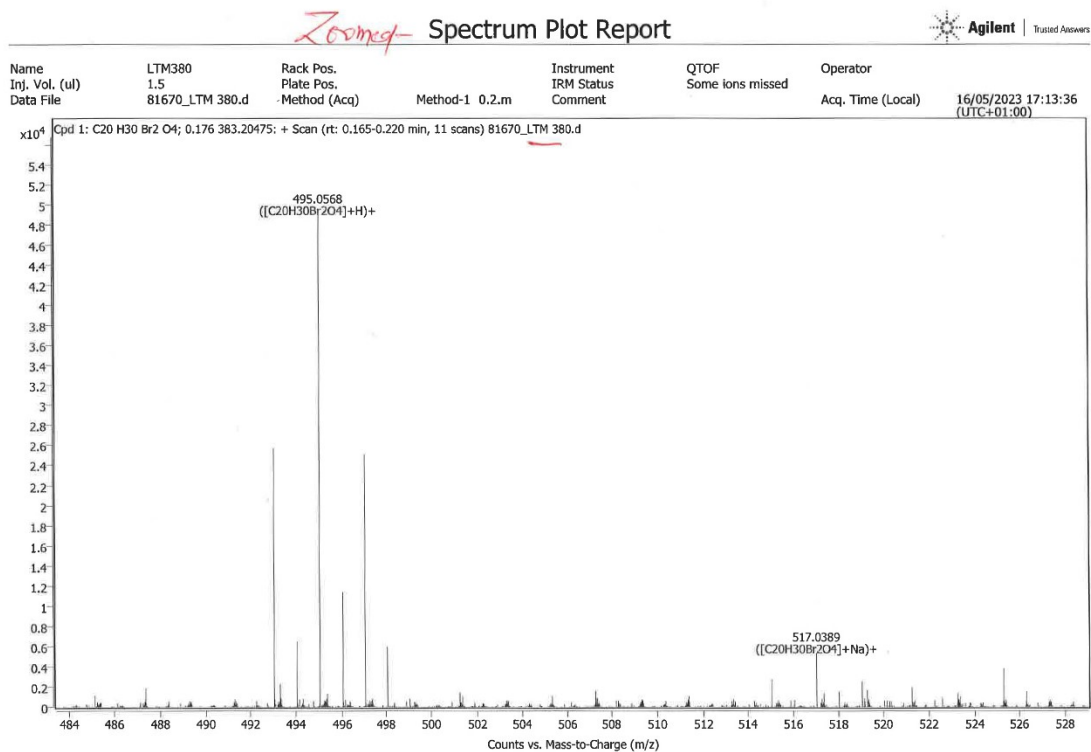

115

F

116 **Figure S7.** MS of compound 2

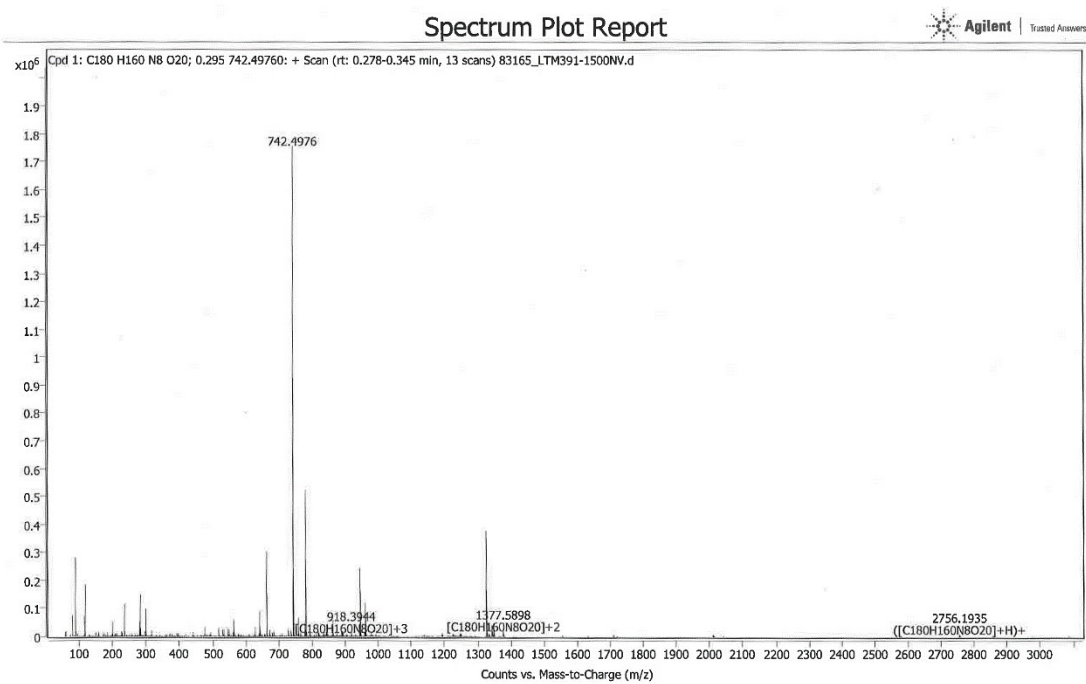

117

118 **Figure S8.** MS of compound 3

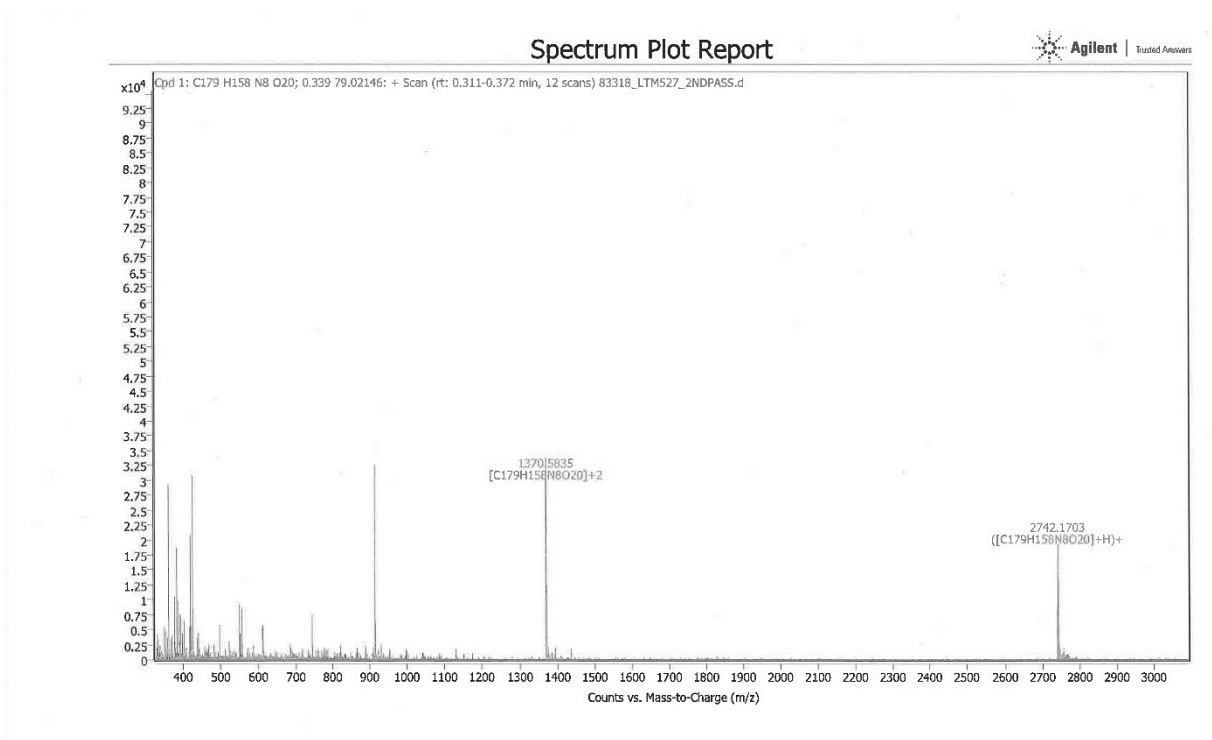

119

120 **Figure S9.** MS of compound **Spiro-B**

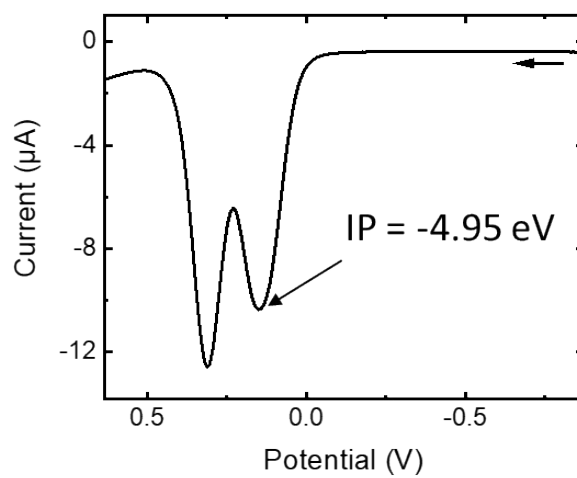

121

Figure S10. Square wave voltammetry of **Spiro-B** recorded in dichloromethane at a concentration of  $10^{-4}$  mol L $^{-1}$  and referenced to a ferrocenium/ferrocene standard. Direction of scan indicated on plot. Ionisation potential (IP) estimated as  $-4.80$  eV ( $\text{Fc}^+/\text{Fc}$ ) - 1 $^{\text{st}}$  oxidation potential.

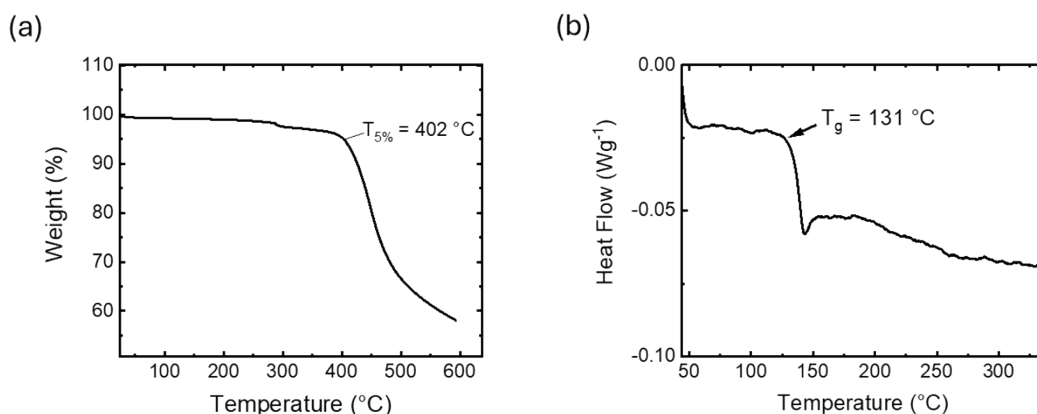

Figure S11. (a) TGA of **Spiro-B**  $T_{5\%}$  indicates the temperature at which a 5% weight loss is recorded. (b) DSC analysis of **Spiro-B**. A glass transition is noted at  $T = T_g$ .

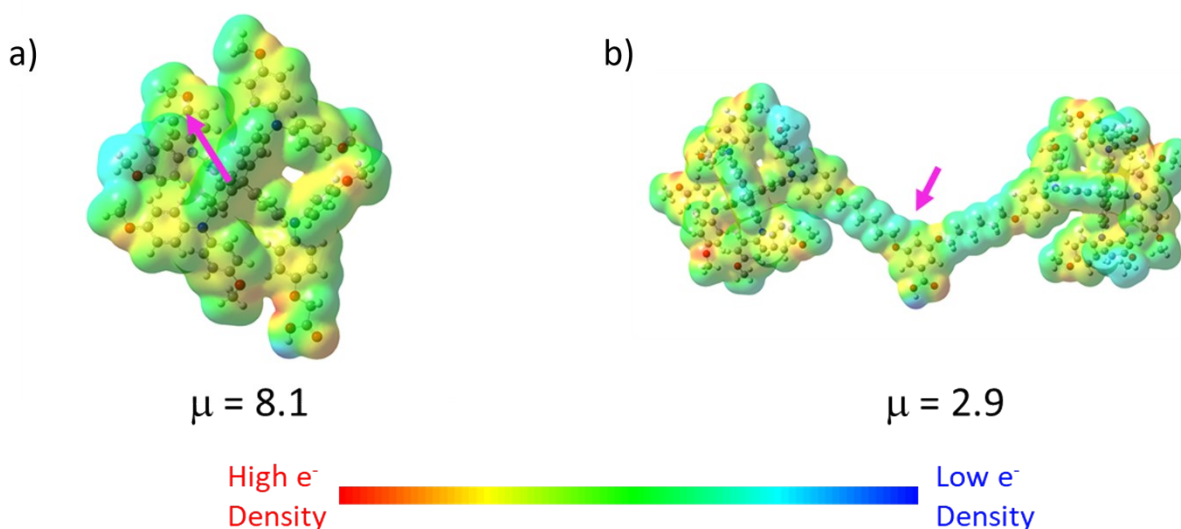

Figure S12. DFT B3LYP 3-21G optimised structures, $^2$  of (a) **Spiro-A** and (b) **Spiro-B** with ESP maps, dipole moment vector (indicated with a pink arrow pointing towards the positive pole), and dipole moment magnitudes shown below the structures.





## 133 **Supplementary Note 2 – TRPL Analysis**

134 To analyse the time-resolved photoluminescence (TRPL) decay of the perovskite films, we  
135 employed a rate equation model that accounts for dominant recombination pathways. The model  
136 describes the time-dependent carrier concentration  $n(t)$  using the differential equation **1**:

$$137 \quad \frac{dn}{dt} = -k_1 n(t) - k_2 n^2(t) \quad (1)$$

138 where  $k_1$  is the first-order (trap-assisted) recombination rate constant, and  $k_2$  is the second-order  
139 (bimolecular) radiative recombination rate constant. To extract meaningful and literature-  
140 consistent values, we assume an initial photoexcited carrier concentration of  $n_0 = 1.0 \times 10^{15} \text{ cm}^{-3}$ ,  
141 as this value was not obtained at the time of the measurement. The resulting values extracted from  
142 applying the rate equation can be seen in **Supplementary Table S2**.

143

## 144 Supplementary Figures

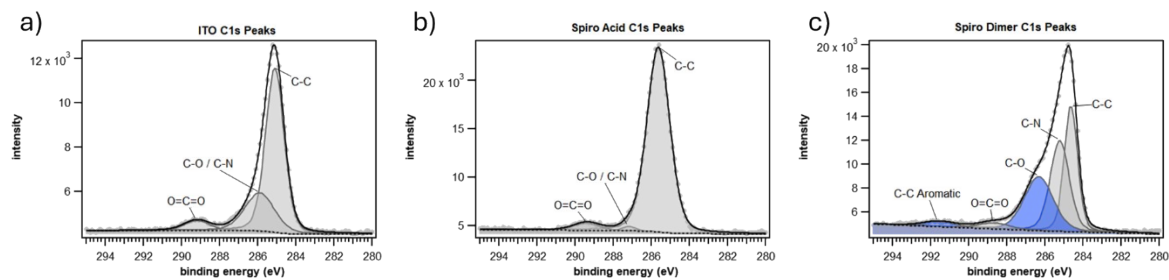

146 **Figure S13.** C1s XPS spectra of a) an ITO substrate, b) ITO coated with **Spiro-A**, c) ITO coated  
147 with **Spiro-B**.

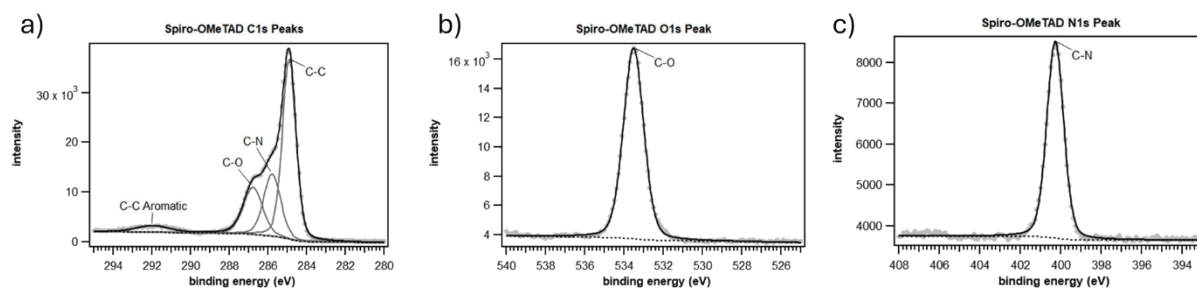

149 **Figure S14.** High-resolution XPS spectra of the a) C1s, b) O1s, and c) N1s regions of a thin film  
150 of spin-coated Spiro-OMeTAD.

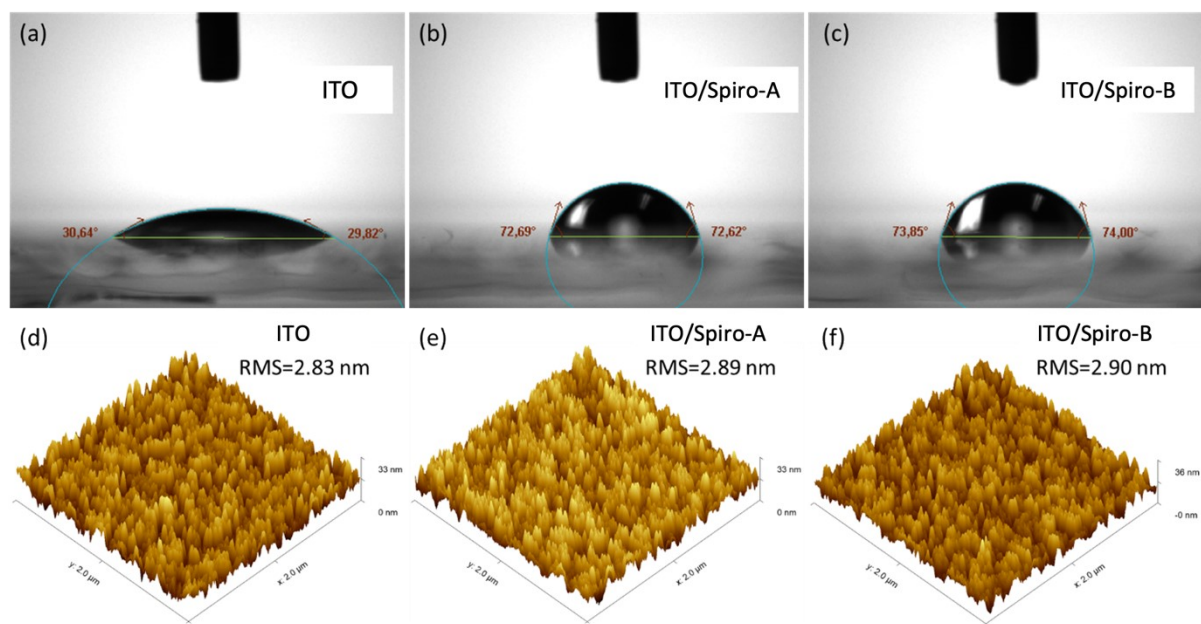

151

152 **Figure S15.** Contact angle measurements of water droplet on a) ITO, b) **Spiro-A**, and c) **Spiro-B**.

153 Atomic force microscopy (AFM) images of d) ITO, e) **Spiro-A**, and f) **Spiro-B**. Here, RMS is the

154 root-mean-square roughness.

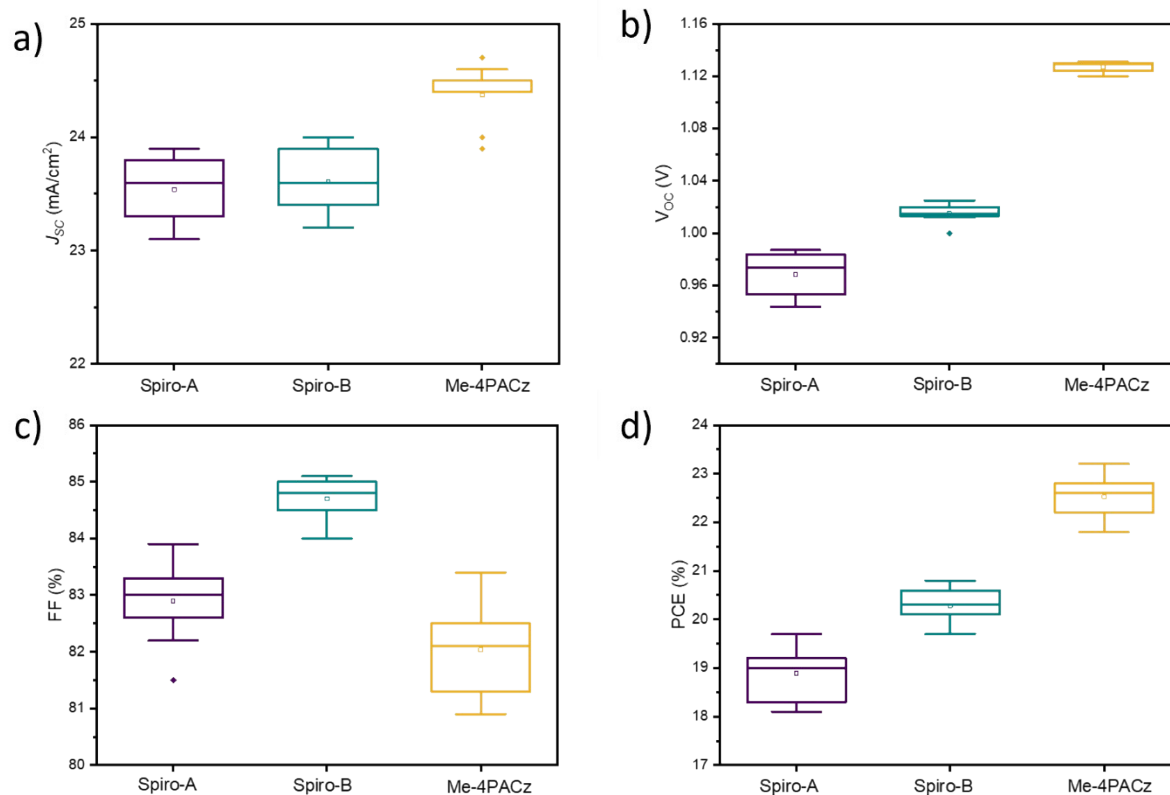

155

156 **Figure S16.** Solar cell JV parameters of **Spiro-A**, **Spiro-B** and **Me-4PACz** for a) short circuit  
 157 current density (mA/cm<sup>2</sup>), b) open circuit voltage (V), c) fill factor (%) and d) power conversion  
 158 efficiency (PCE).

159

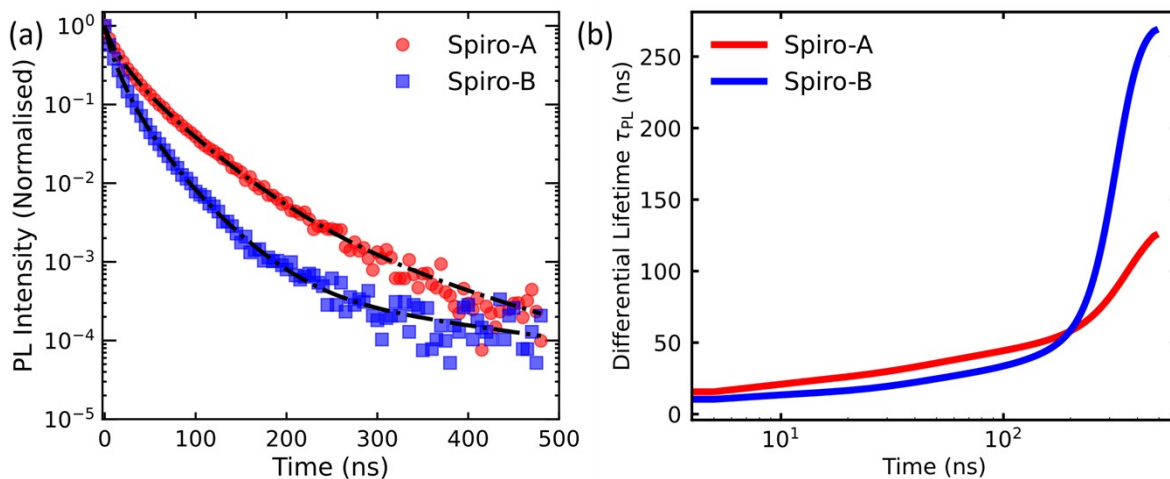

160

161 **Figure S17.** a) Normalised time-resolved photoluminescence (TRPL) data for perovskite films  
 162 deposited on ITO/SAM substrates. The black dashed lines represent fits made using a multi-  
 163 exponential decay to capture the complete dynamics. b) Differential Lifetime plots obtained from  
 164 the multi-exponential fits.

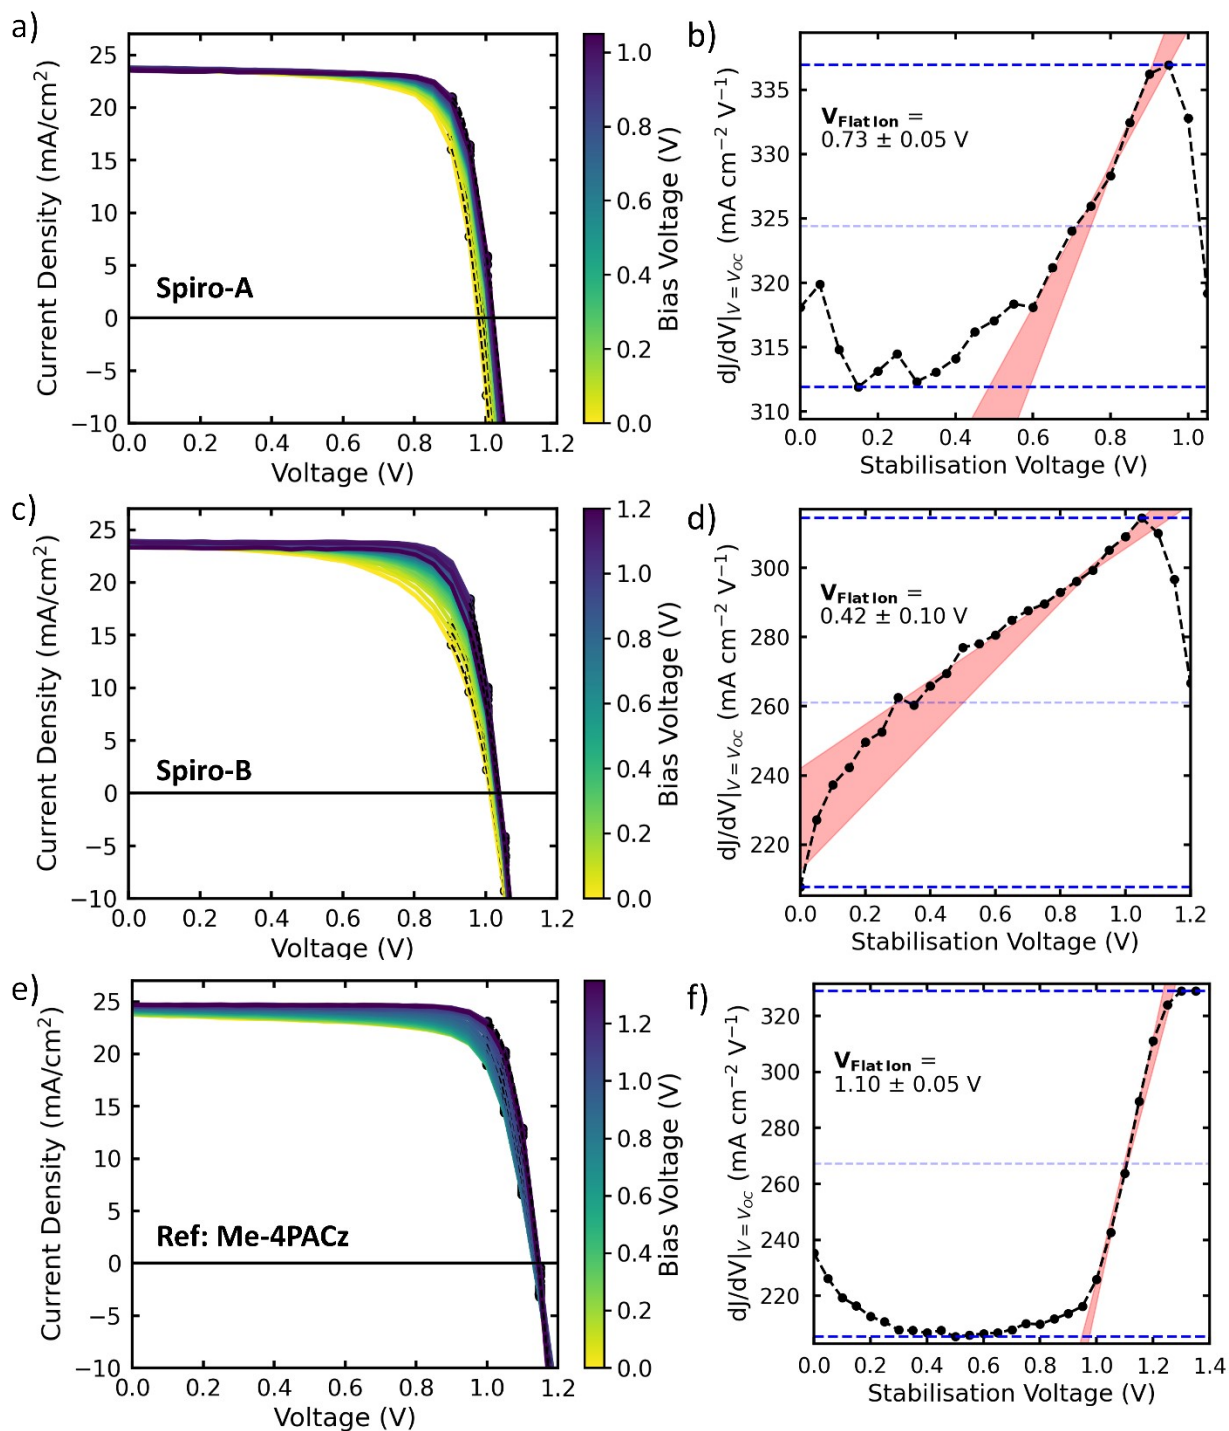

165  
 166 **Figure S18.** Full reconstructed Stabilise and Pulse JVs for a) **Spiro-A**, c) **Spiro-B** and e) **Me-**  
 167 **4PACz** conducted under 1 Sun conditions. dJ/dV analysis for b) **Spiro-A**, d) **Spiro-B** and f) **Me-**  
 168 **4PACz**.

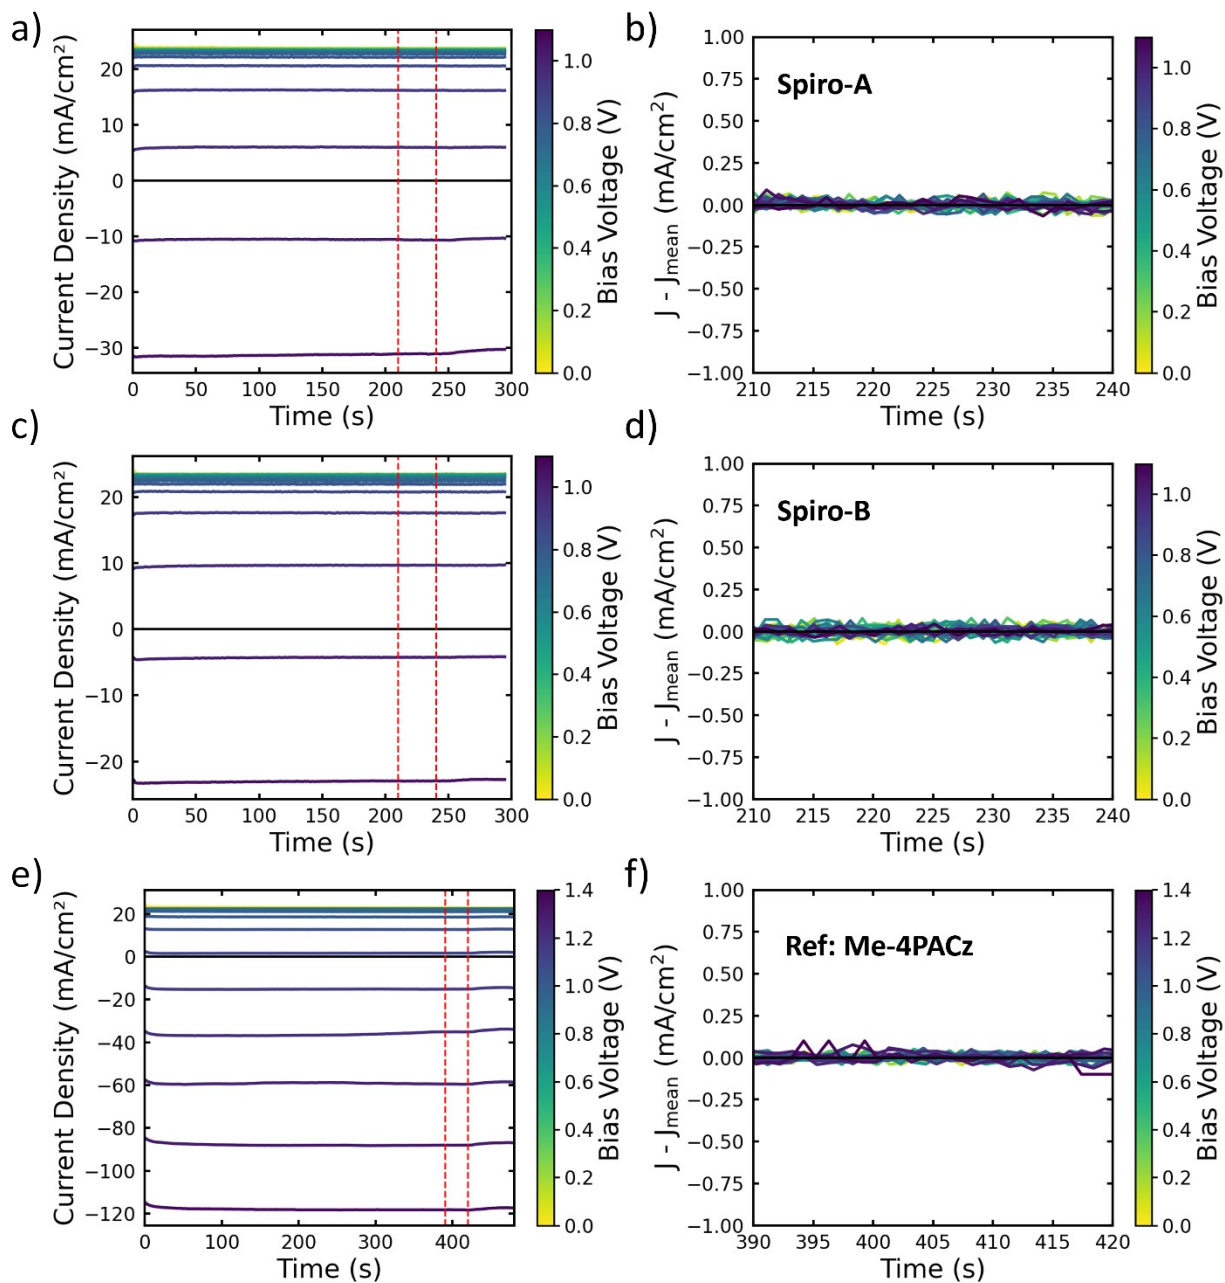

169

170 **Figure S19.** Full stabilisation data obtained during the Stabilise and Pulse measurement for a)  
 171 **Spiro-A**, c) **Spiro-B** and e) **Me-4PACz**. Current minus the mean current for the final 30 seconds  
 172 before pulsing regime for b) **Spiro-A**, d) **Spiro-B** and f) **Me-4PACz**.

173

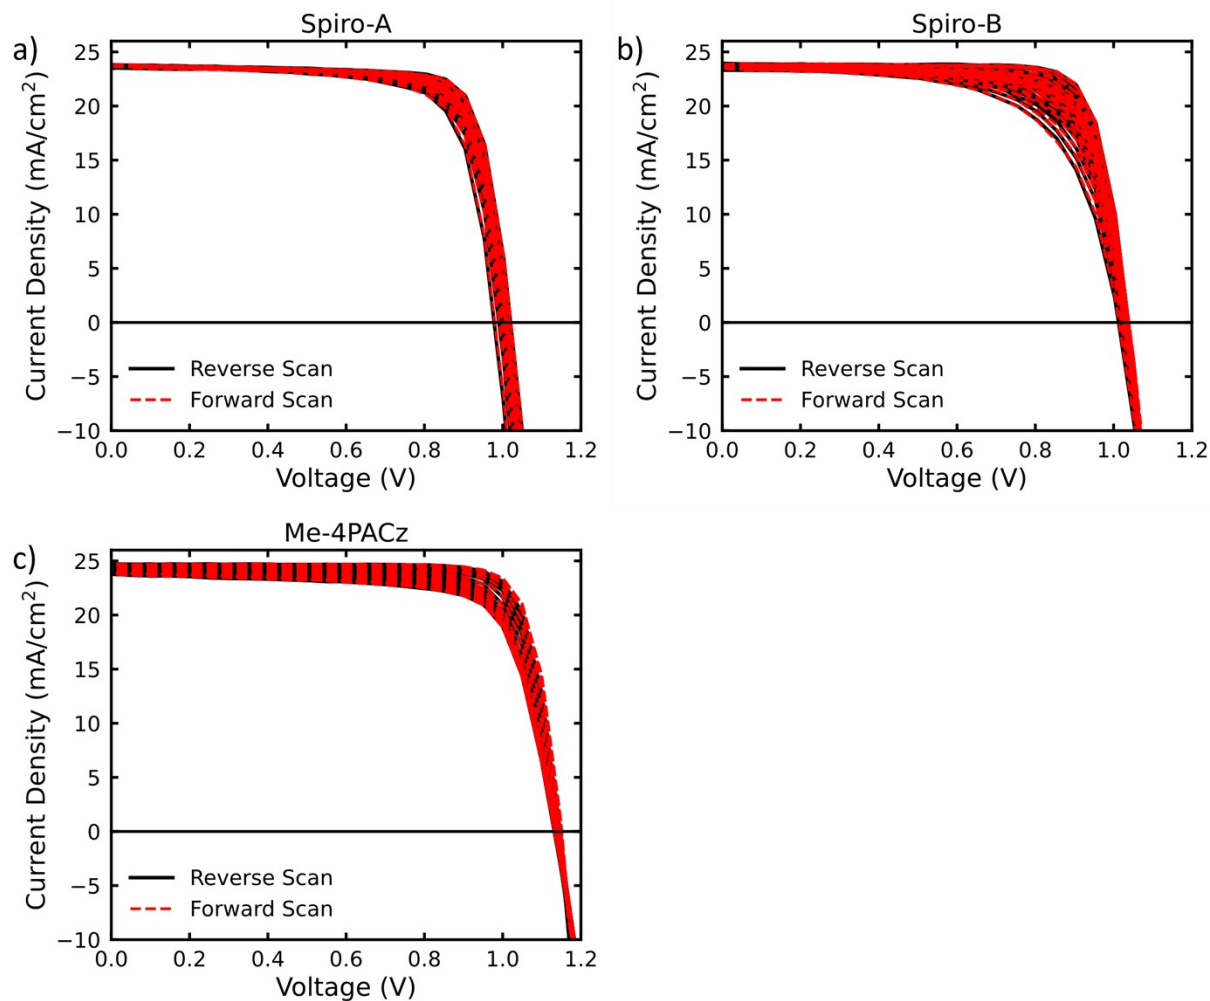

174

175 **Figure S20.** Reconstructed forward and reverse scans from the Stabilise and Pulse measurement  
 176 for a) **Spiro-A**, b) **Spiro-B** and c) **Me-4PACz**. Reverse scans are shown as solid black lines and  
 177 reverse scans as dashed red lines for a range of stabilisation voltages.



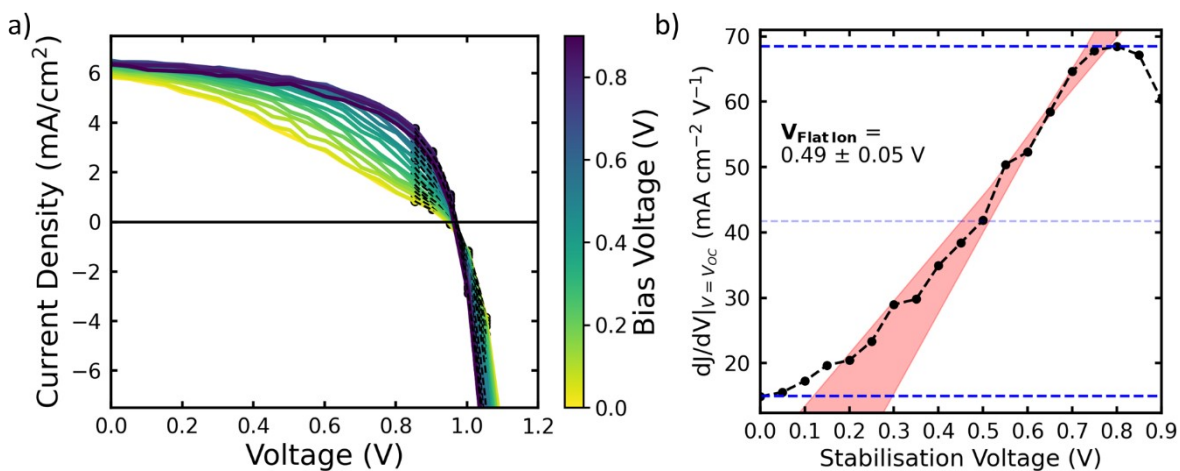

Fi

178

179 **gure S21.** a) Full reconstructed low-light Stabilise and Pulse JVs for bias voltages 0-0.90 V  
 180 conducted at ~0.30 Suns for **Spiro-B**. b) dJ/dV analysis of the low-light **Spiro-B** SaP.

181 **Supplementary Tables**

| Material  | C-C      | C-N      | C-O    | O=C=O   | C (Aro) |
|-----------|----------|----------|--------|---------|---------|
| ITO-Ref   | 285.11   | 285.9    |        | 289.2   |         |
| Spiro Ref | 284.91   | 285.79   | 286.78 |         | 291.96  |
| Spiro-A   | 285.64   |          | 287.18 | 289.42  |         |
| Spiro-B   | 284.65   | 285.21   | 286.34 | 288.66  | 291.57  |
| Material  | N 1s (a) | N 1s (b) |        |         |         |
| ITO-Ref   |          |          |        |         |         |
| Spiro Ref | 400.28   |          |        |         |         |
| Spiro-A   | 400.02   | 401.18   |        |         |         |
| Spiro-B   | 399.82   | 400.38   |        |         |         |
| Material  | O-In     | O-In-Def | HO-In  | O-C     |         |
| ITO-Ref   | 530.36   | 531.17   | 532.1  |         |         |
| Spiro Ref |          |          |        | 533.52  |         |
| Spiro-A   | 530.39   | 531.19   | 532.15 | 533.07  |         |
| Spiro-B   | 530.35   | 530.9    | 531.65 | 533.18  |         |
| Material  | In 3d A  | In 3d a  |        | Sn 3d A | Sn 3d a |

|                  |        |        |
|------------------|--------|--------|
| <b>ITO-Ref</b>   | 444.96 | 452.51 |
| <b>Spiro Ref</b> |        |        |
| <b>Spiro-A</b>   | 444.95 | 452.5  |
| <b>Spiro-B</b>   | 444.9  | 452.45 |

|        |        |
|--------|--------|
| 487.13 | 495.54 |
|        |        |
| 487.11 | 495.54 |
| 487.04 | 495.46 |

182

183 **Table S1.** Fitted XPS Peak Positions

| $\frac{dn}{dt} = -k_1 n(t) - k_2 n^2(t)$ |                                        |                          |                             |                                                      |                          |                      |
|------------------------------------------|----------------------------------------|--------------------------|-----------------------------|------------------------------------------------------|--------------------------|----------------------|
| <b>SAM</b>                               | <b>k<sub>1</sub> (ns<sup>-1</sup>)</b> | <b>k<sub>1</sub> (%)</b> | <b>1/k<sub>1</sub> (ns)</b> | <b>k<sub>2</sub> (cm<sup>3</sup>ns<sup>-1</sup>)</b> | <b>k<sub>2</sub> (%)</b> | <b>r<sup>2</sup></b> |
| <b>Spiro-A</b>                           | 4.49x10 <sup>-3</sup>                  | 28.00                    | 222.72                      | 3.15x10 <sup>-19</sup>                               | 72.0                     | 0.996                |
| <b>Spiro-B</b>                           | 7.52x10 <sup>-3</sup>                  | 26.70                    | 132.98                      | 5.83x10 <sup>-19</sup>                               | 73.3                     | 0.999                |

184

185 **Table S2.** Extracted TRPL decay rate values using the rate equation for the bimolecular-trapping  
 186 Auger model as shown in the first row. All measurements were conducted on half-cells using  
 187 ITO/SAM/Perovskite. In the rate equation, k<sub>1</sub> is monomolecular recombination, k<sub>2</sub> is the rate of  
 188 bimolecular recombination, n is the photoexcited carrier concentration, and t is time.

## 189 **References**

- 190 1. Z. Zeng, *et al.*, *J. Control. Release*, 2019, **315**, 206–213.
- 191 2. M. J. Frisch, G. W. Trucks, H. B. Schlegel, G. E. Scuseria, M. A. Robb, J. R. Cheeseman, G.
- 192 Scalmani, V. Barone, B. Mennucci, G. A. Petersson *et al.*, Gaussian 09, Revision D.01,
- 193 Gaussian, Inc., Wallingford CT, 2013.

194
